# Supplementary material
Source: Research Square preprint supplement (doi:10.21203/rs.3.rs-8802998/v1)
Supplement: Supplementary file 1 [file a084d9934242248408316330.docx]

**Supplementary Information**

**Commonalities and differences in national pathways toward net-zero emissions**

Contents

[Supplementary Figures 2](#_Toc225785236)

[1. Regression of key variables taking Emissions|CO2 2](#_Toc225785237)

[2. Regression of key variables taking changes from base year 2020 3](#_Toc225785238)

[3. Regression charts with countries shown in color 4](#_Toc225785239)

[4. Cumulative carbon emissions in net-zero scenario and effort sharing budgets by taking Emissions|CO2 7](#_Toc225785240)

[5. Emissions coverage by taking Emissions|CO2 8](#_Toc225785241)

[6. Individual countries cumulative emissions vs effort sharing allocation of global emissions 9](#_Toc225785242)

[Supplementary Tables 12](#_Toc225785243)

[Table 1: Models considered for main figures in the manuscript 12](#_Toc225785244)

[Table 2: Models considered for supplementary Fig. 1, Fig. 4, Fig. 5 13](#_Toc225785245)

## Supplementary Figures

### Regression of key variables taking Emissions|CO2


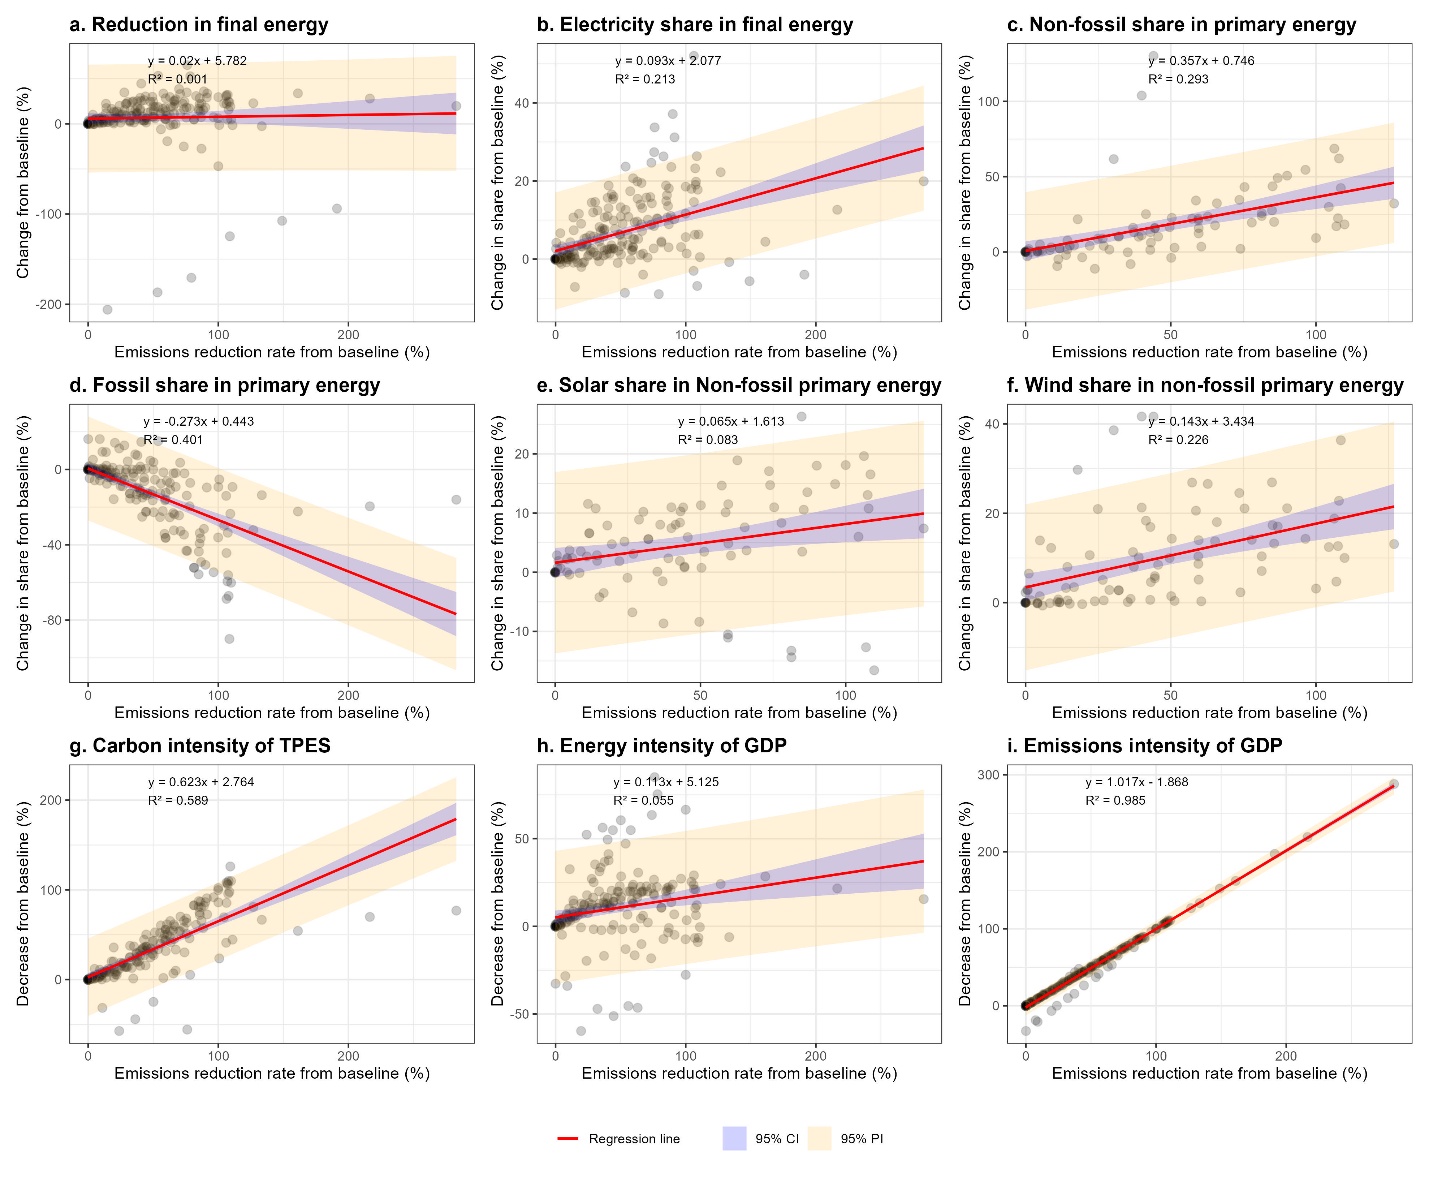


### Regression of key variables taking changes from base year 2020


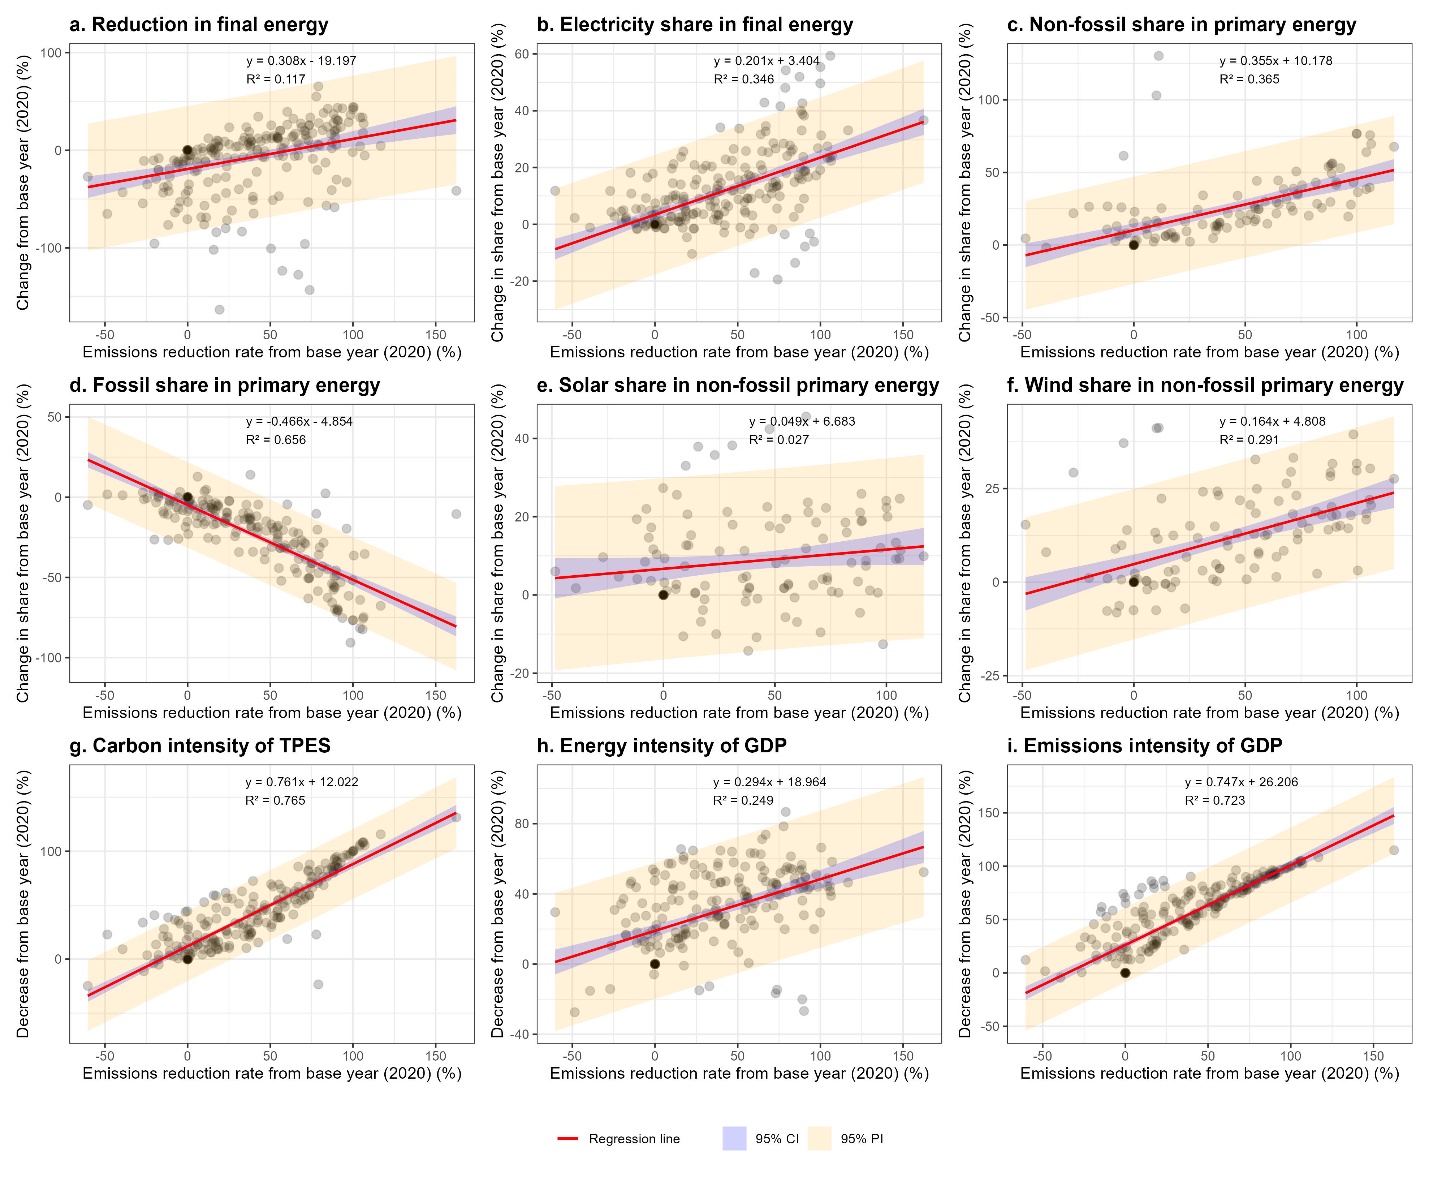


### Regression charts with countries shown in color


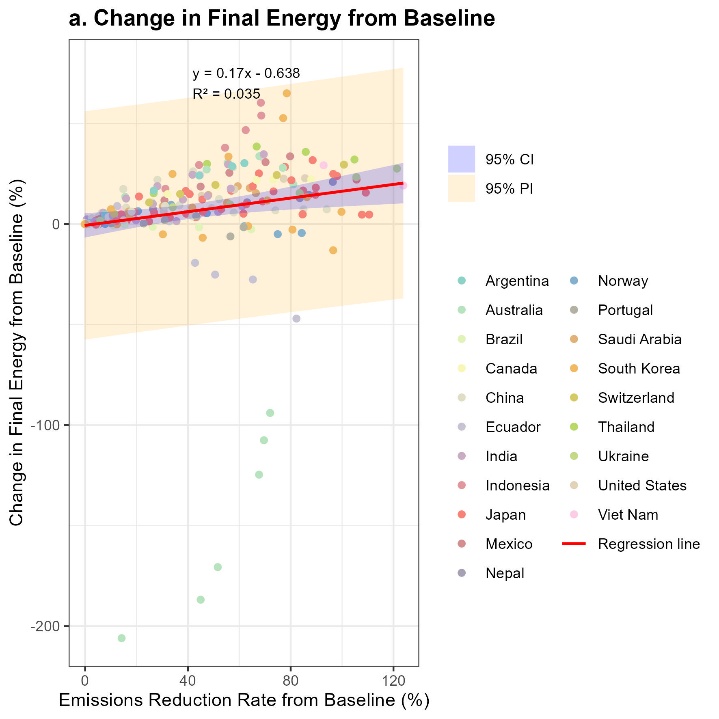

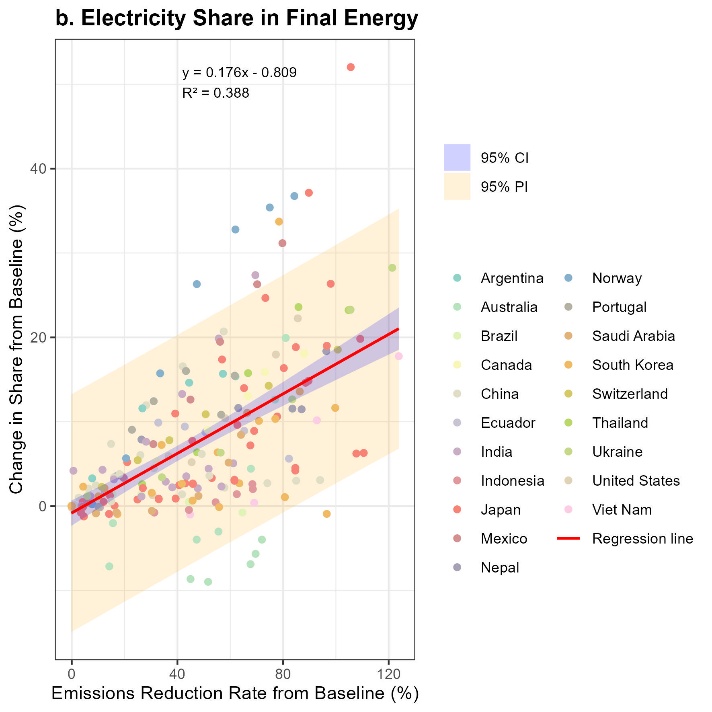

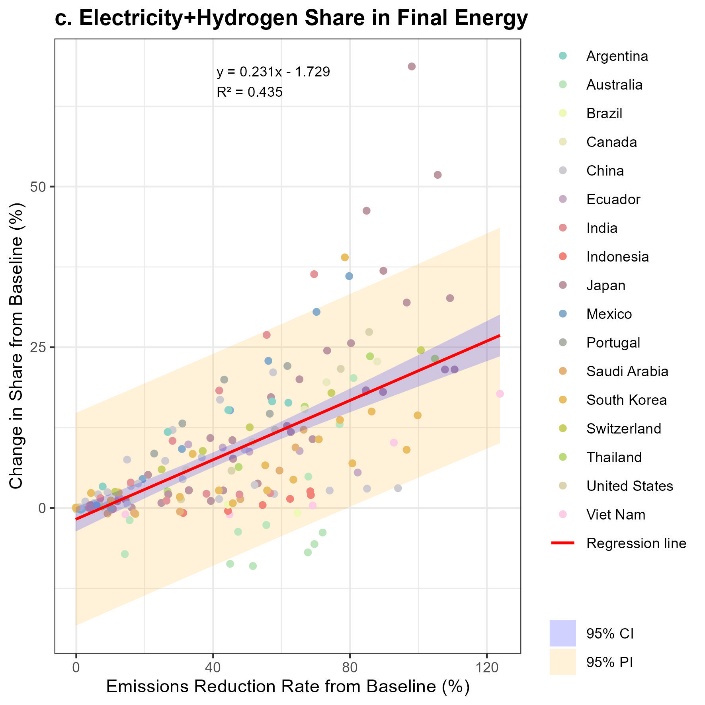

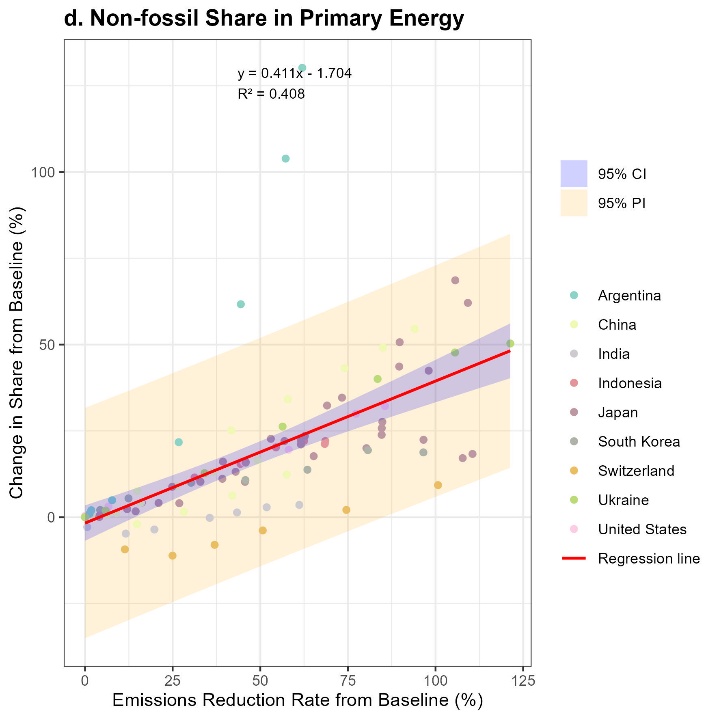

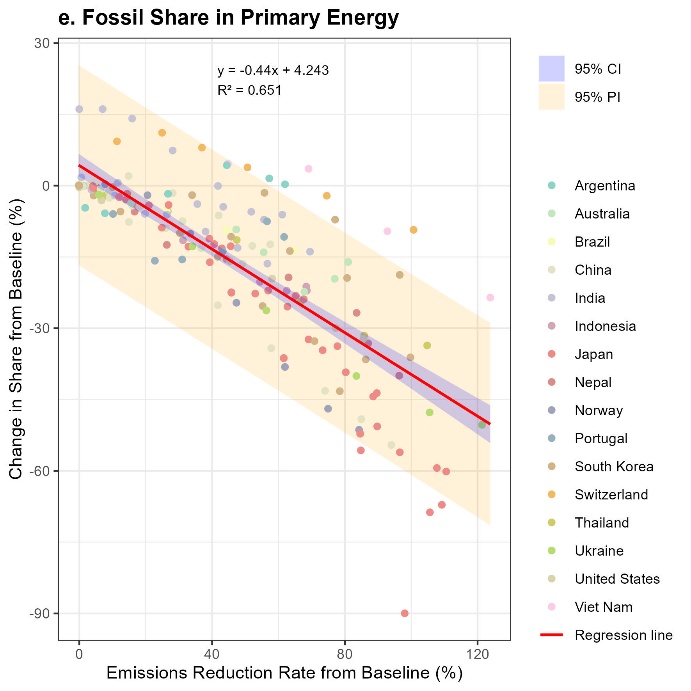

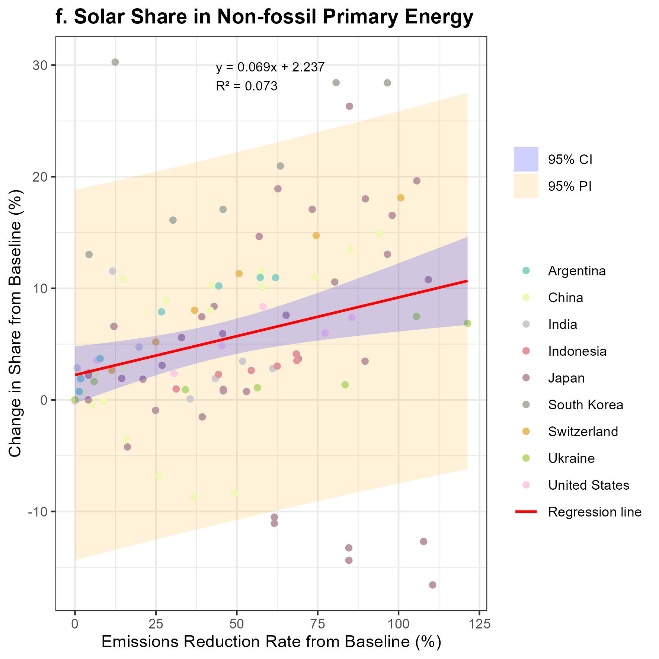

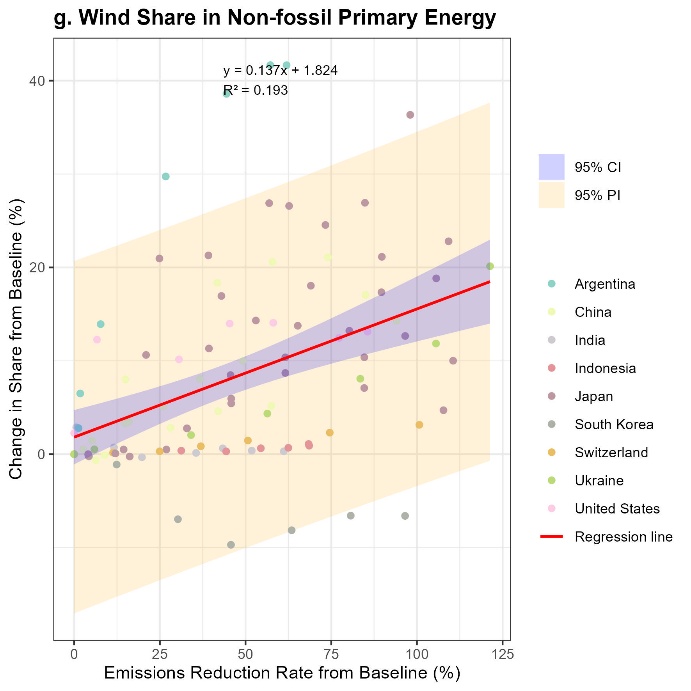

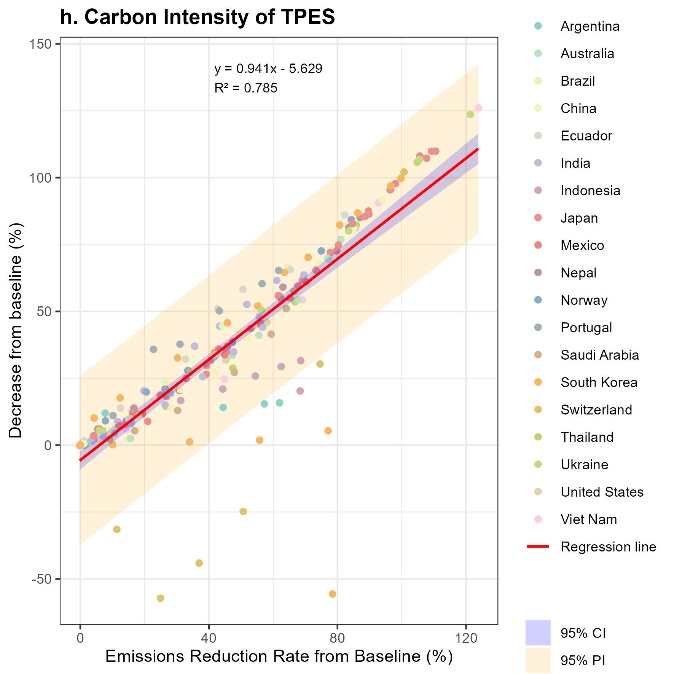

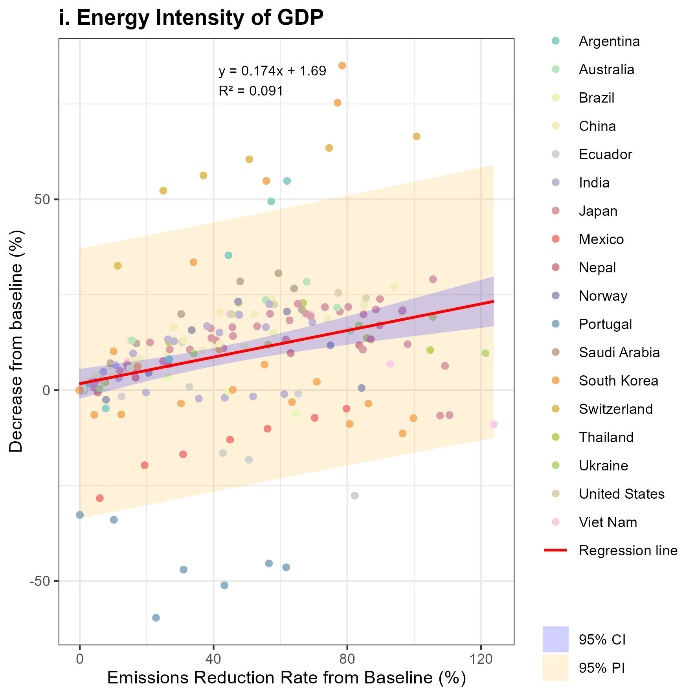

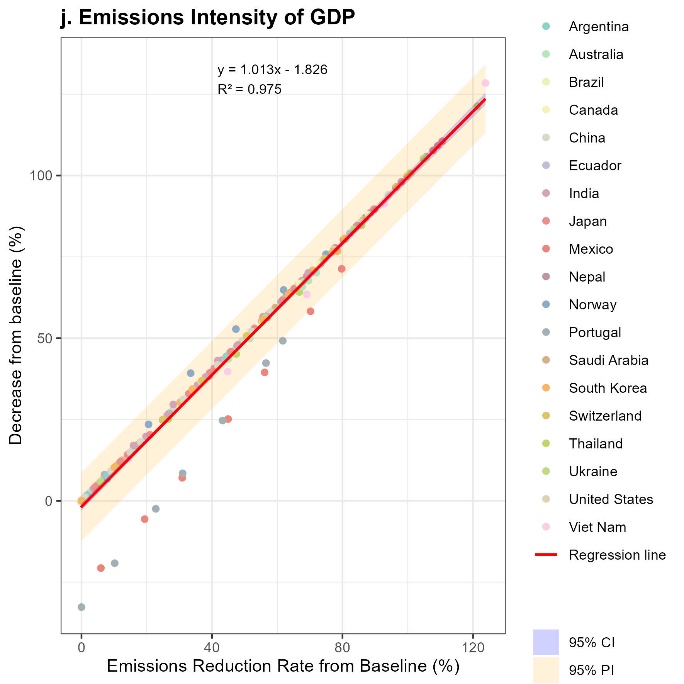

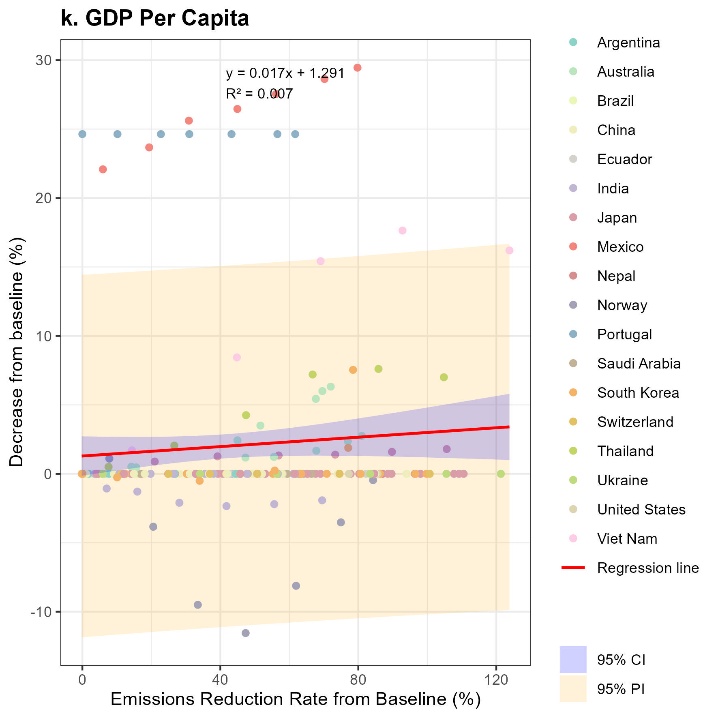


### Cumulative carbon emissions in net-zero scenario and effort sharing budgets by taking Emissions|CO2


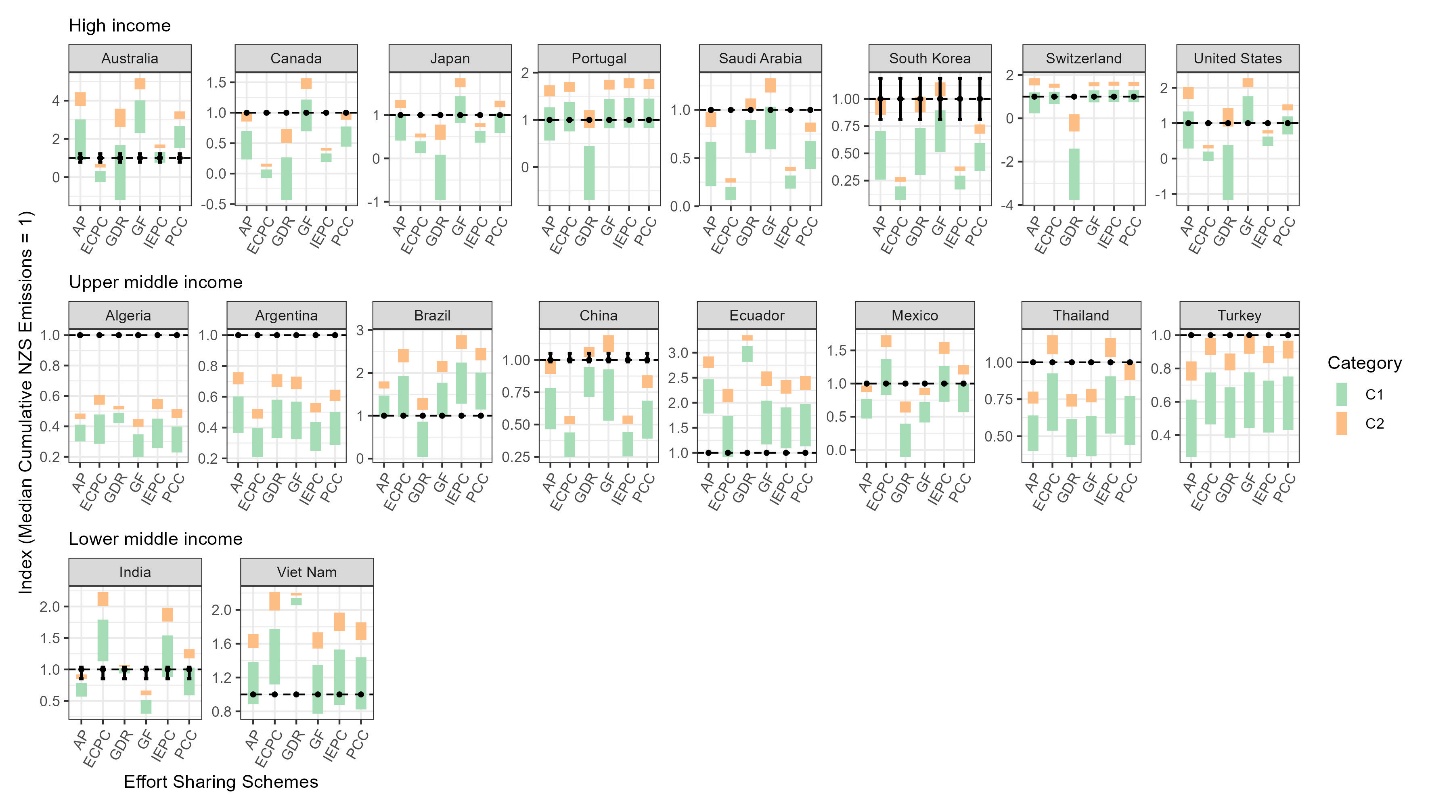


### Emissions coverage by taking Emissions|CO2


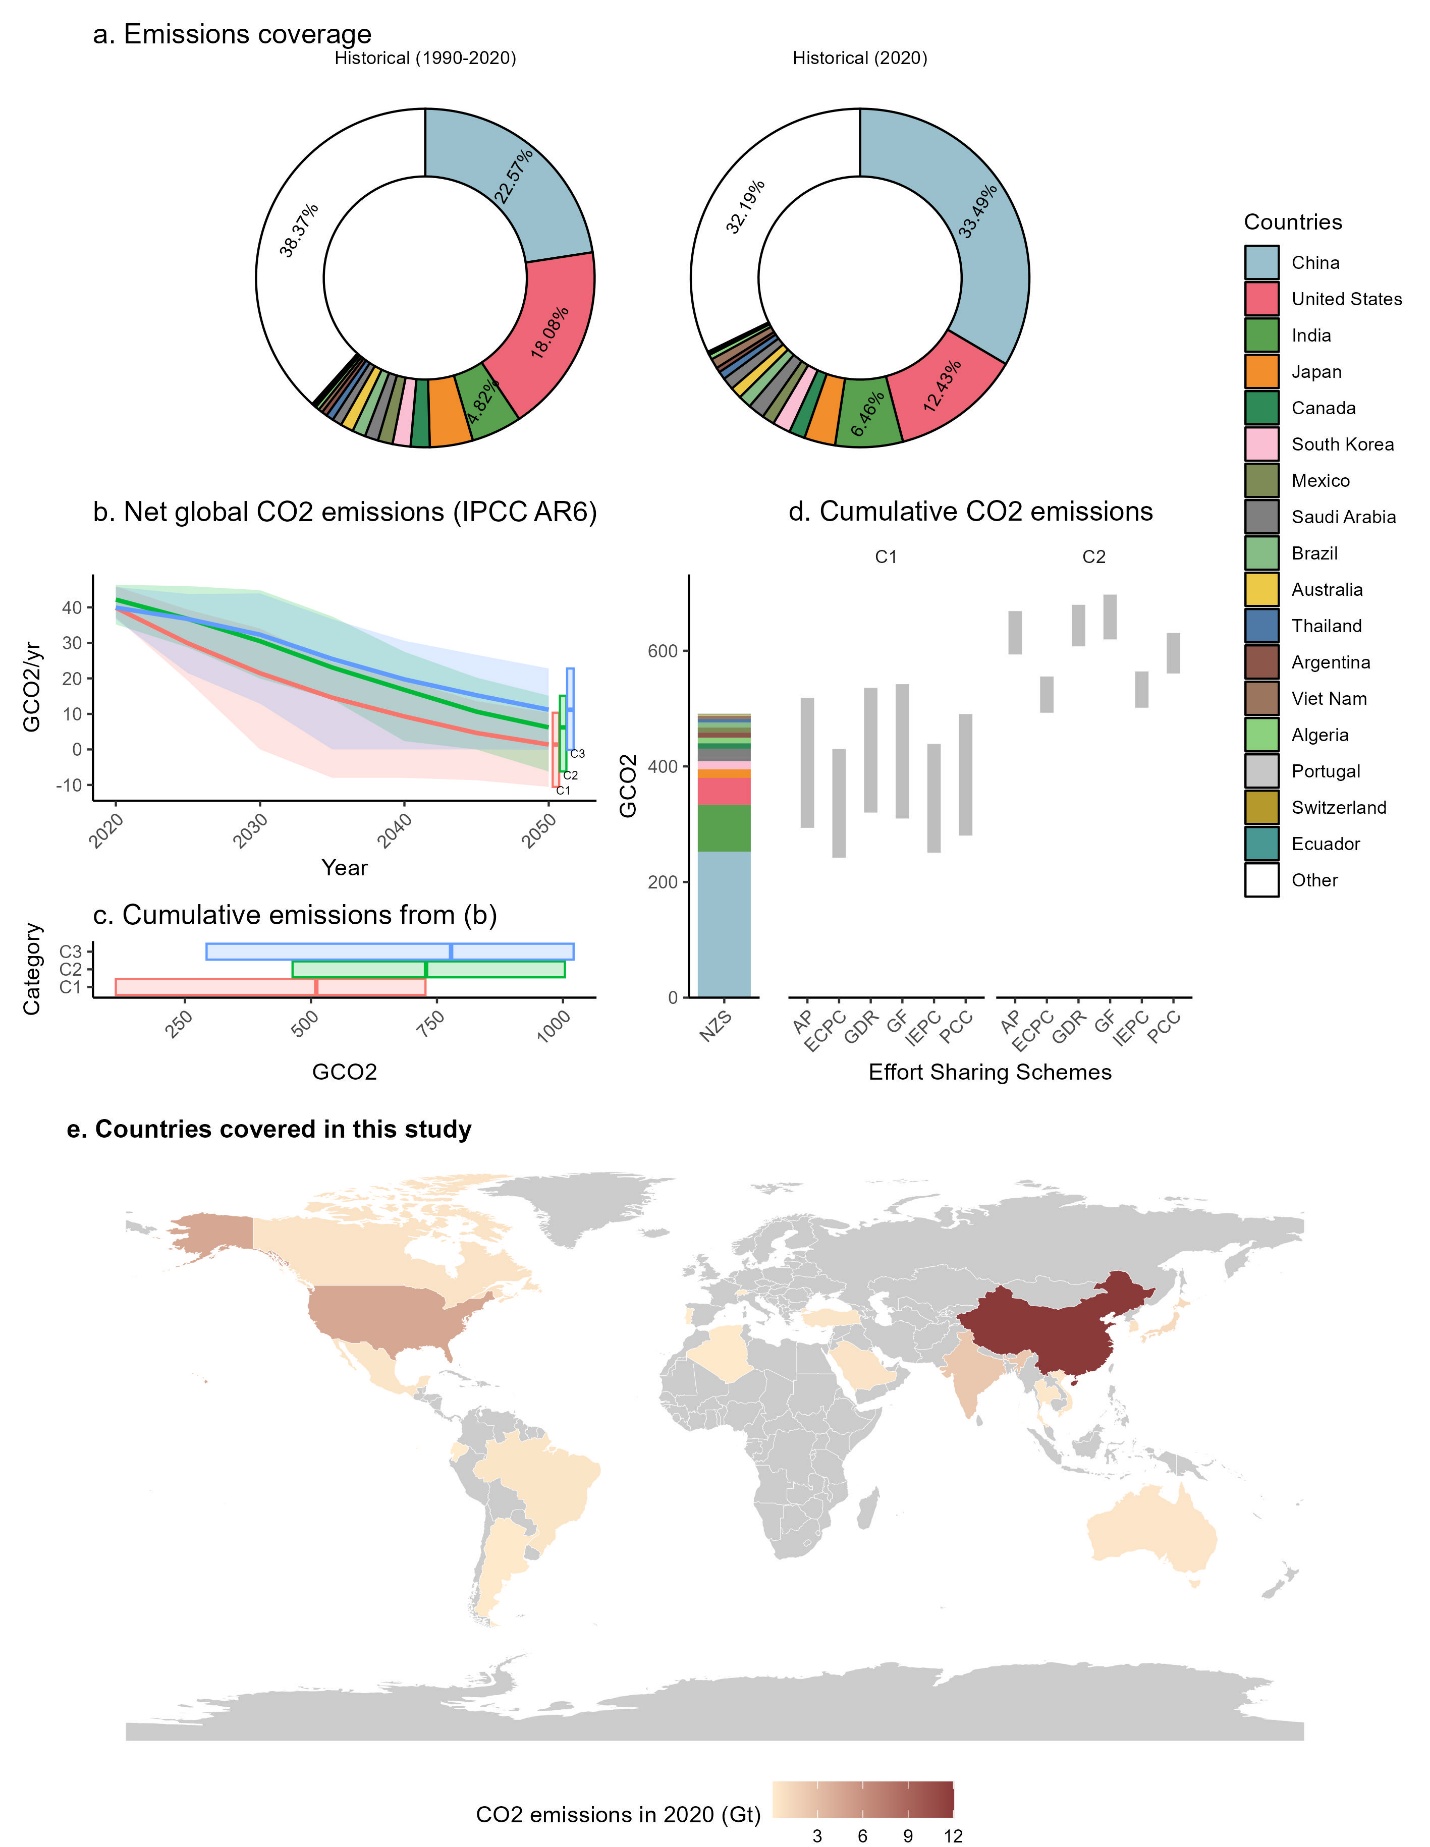


### Individual countries cumulative emissions vs effort sharing allocation of global emissions


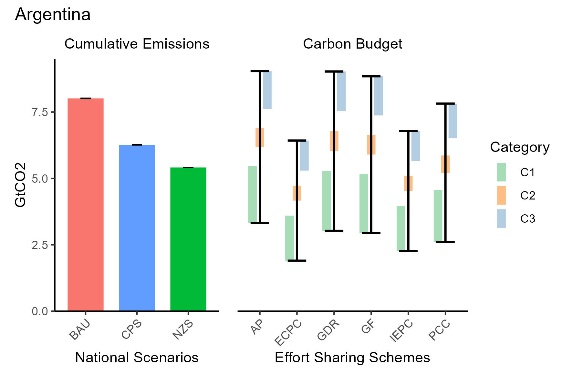

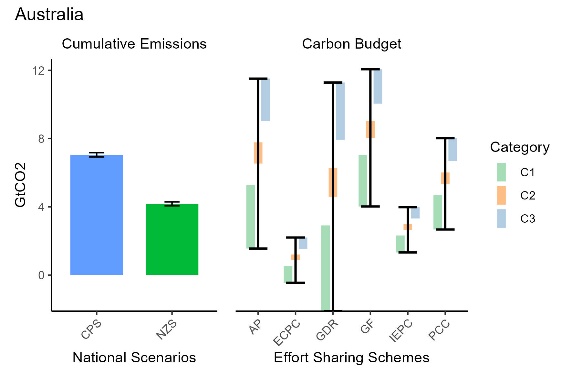

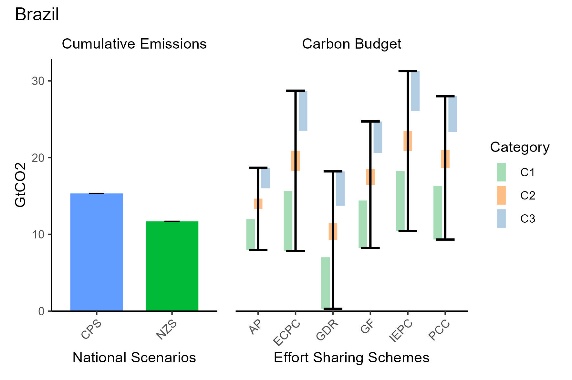

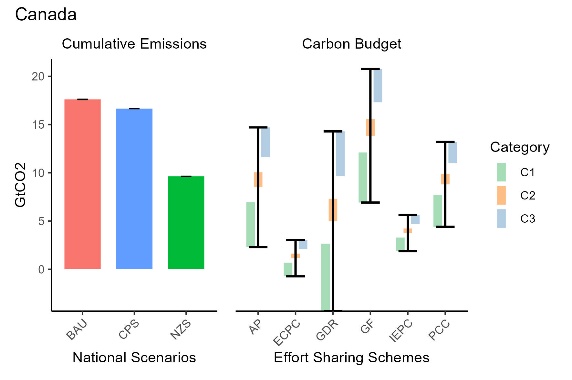

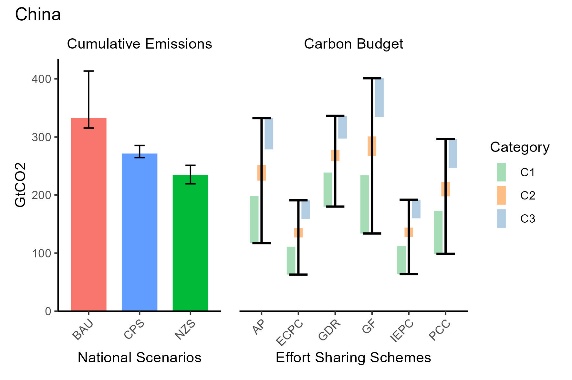

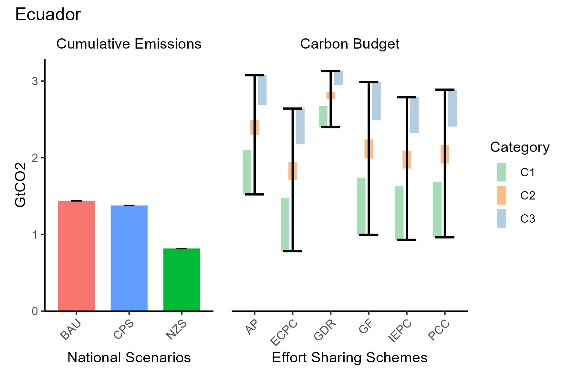

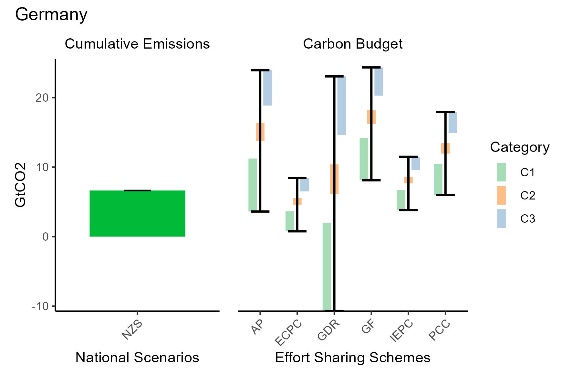

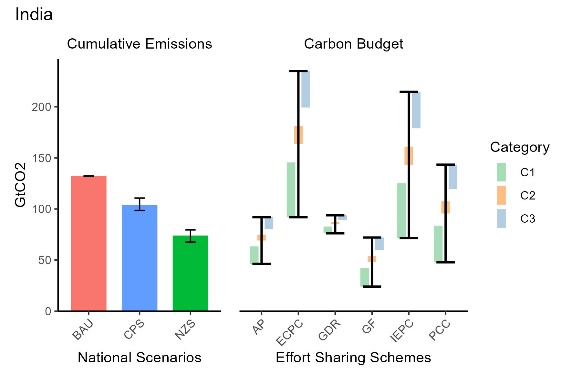

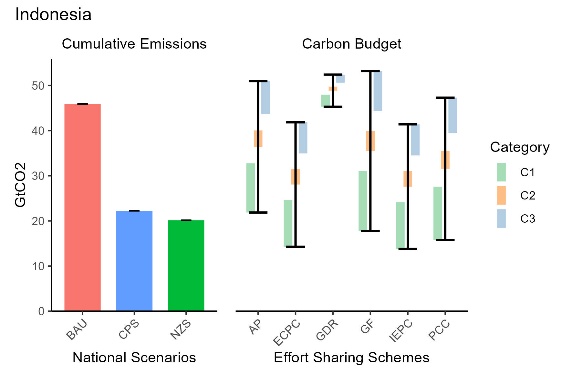

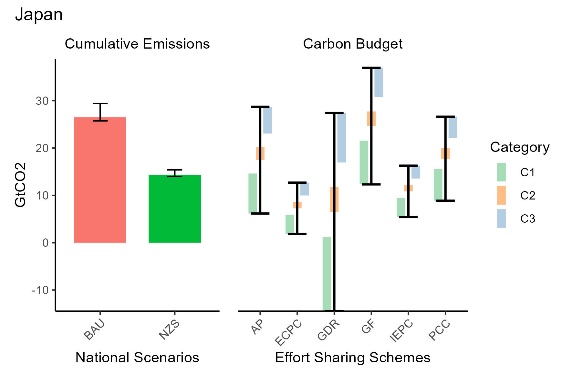

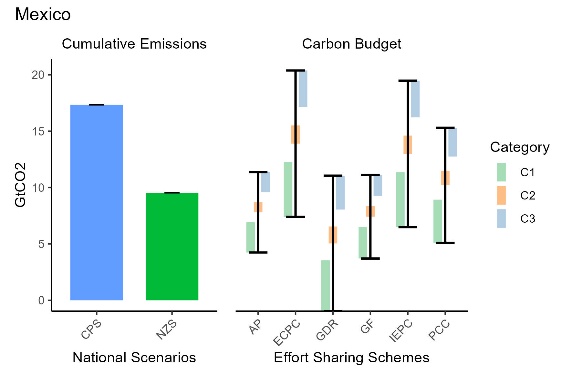

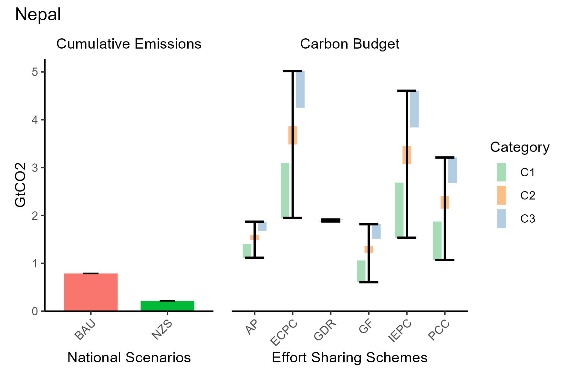

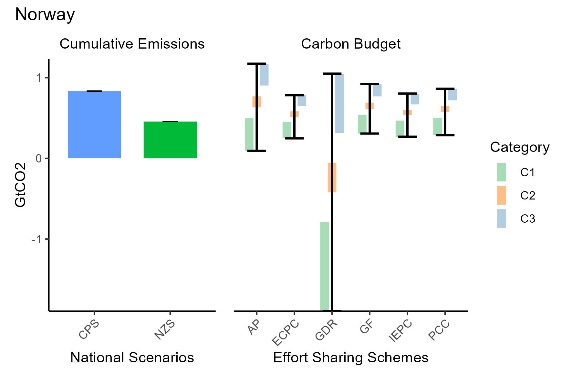

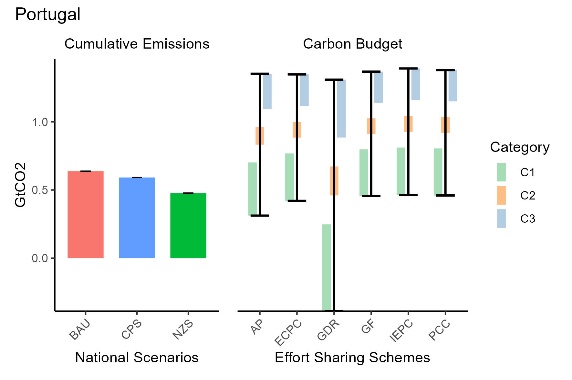

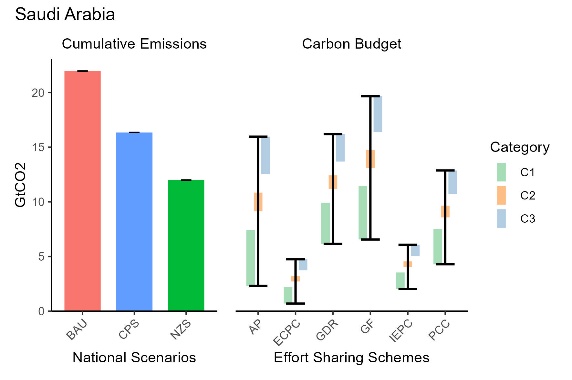

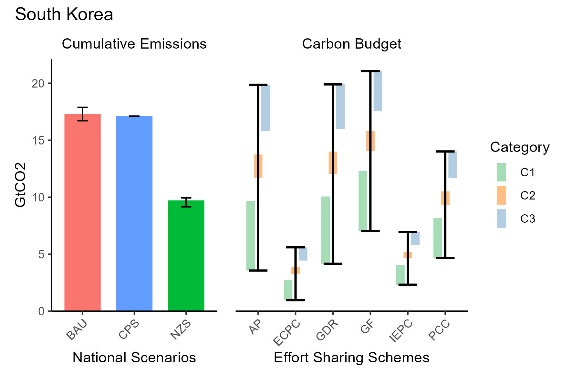

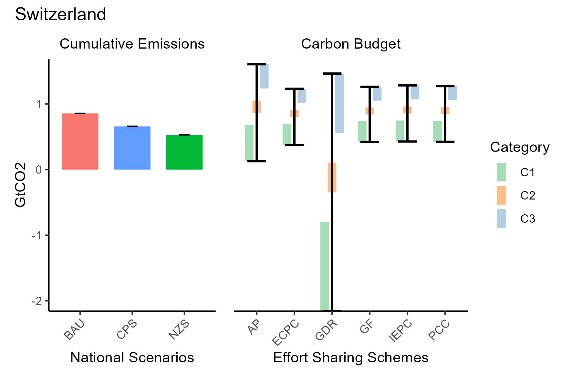

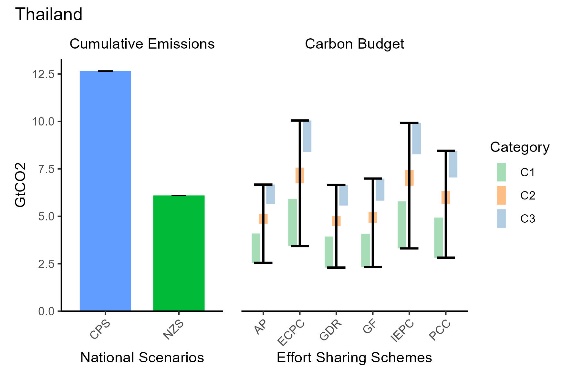

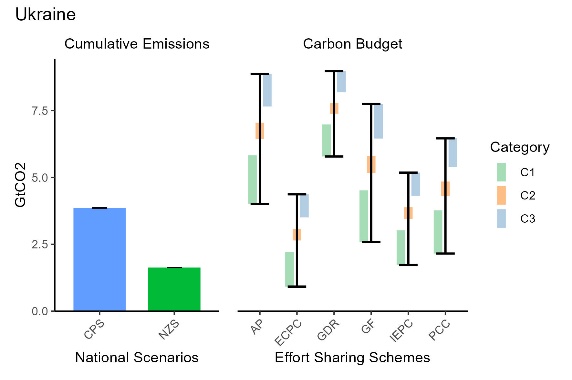

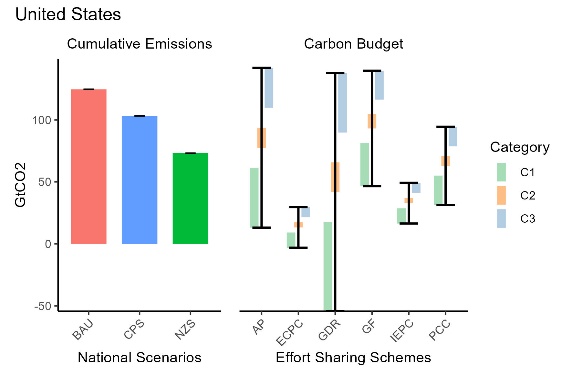

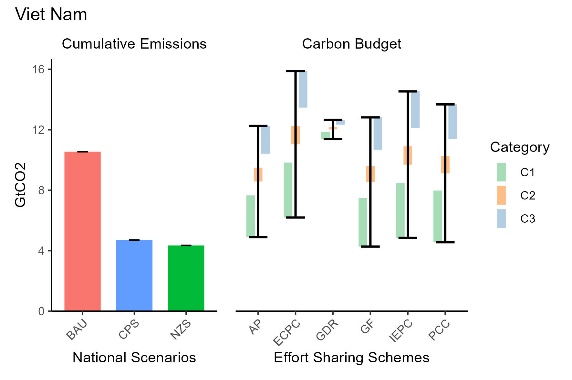


## Supplementary Tables

### Table 1: Models considered for main figures in the manuscript

| SN | Model | Region | Scenario |
| --- | --- | --- | --- |
| 1 | AIM-Thailand 1 | Thailand | CPS, NZS |
| 2 | AIM/Enduse India 3.3 | India | BAU, CPS, NZS |
| 3 | AIM/Hub-Japan 2.4 | Japan | BAU, NZS |
| 4 | AIM/Hub-Vietnam 2.2 | Viet Nam | BAU, CPS, NZS |
| 5 | AIM/Nepal V1.0 | Nepal | BAU, NZS |
| 6 | AIM/Technology-Japan 2.1 | Japan | BAU, NZS |
| 7 | ASEAN Energy Outlook AEO8 | Indonesia | BAU, CPS, NZS |
| 8 | ATEM v1 | Australia | CPS, NZS |
| 9 | BLUES 2.0 | Brazil | CPS, NZS |
| 10 | China TIMES 2 | China | BAU, CPS, NZS |
| 11 | D-TIMES_3 | Japan | BAU, NZS |
| 12 | DNE21+ V.16_JMIP | Japan | BAU, NZS |
| 13 | ELENA v1 | Ecuador | BAU, CPS, NZS |
| 14 | GCAM KAIST 2.0 | South Korea | CPS, NZS |
| 15 | GCAM-China-v6 | China | BAU, CPS, NZS |
| 16 | GCAM-KSA V1.0 | Saudi Arabia | BAU, CPS, NZS |
| 17 | GCAM-USA-CGS | United States | BAU, CPS, NZS |
| 18 | GRACE Nor_v1.0 | Norway | CPS, NZS |
| 19 | GTEM-C v1 | Australia | CPS, NZS |
| 20 | IEEJ-NE_Japan v2023 | Japan | BAU, NZS |
| 21 | India Energy Policy Simulator 3.1.3 | India | CPS, NZS |
| 22 | KLEM/ENERGYPATHWAYS/RIO-MX 1 | Mexico | CPS, NZS |
| 23 | KLEM/LEAP-ARG 1 | Argentina | BAU, CPS, NZS |
| 24 | MESSAGEix-Canada 1 | Canada | BAU, CPS, NZS |
| 25 | MESSAGEix-KOR 1 | South Korea | BAU, NZS |
| 26 | PECE-LIU 2024_V1.0 | China | BAU, CPS, NZS |
| 27 | PROMETHEUS V2 China | China | CPS, NZS |
| 28 | PROMETHEUS V2 India | India | CPS, NZS |
| 29 | REMod V1.0 | Germany | NZS |
| 30 | Swiss TIMES Energy System Model (STEM) 2 | Switzerland | BAU, CPS, NZS |
| 31 | TIMES-Japan 3.3 | Japan | BAU, NZS |
| 32 | TIMES-Japan 3.4 | Japan | BAU, NZS |
| 33 | TIMES-Portugal 9.3 | Portugal | BAU, CPS, NZS |
| 34 | TIMES-Ukraine v1 | Ukraine | CPS, NZS |
| 35 | UNICON-K-Power 2 | South Korea | BAU, NZS |

### Table 2: Models considered for supplementary Fig. 1, Fig. 4, Fig. 5

| SN | Model | Region | Scenario |
| --- | --- | --- | --- |
| 1 | AIM-Thailand 1 | Thailand | CPS, NZS |
| 2 | AIM/Enduse India 3.3 | India | BAU, CPS, NZS |
| 3 | AIM/Hub-Japan 2.4 | Japan | BAU, NZS |
| 4 | AIM/Hub-Vietnam 2.2 | Viet Nam | BAU, CPS, NZS |
| 5 | AIM/Technology-Japan 2.1 | Japan | BAU, NZS |
| 6 | ATEM v1 | Australia | CPS, NZS |
| 7 | BLUES 2.0 | Brazil | CPS, NZS |
| 8 | China TIMES 2 | China | BAU, CPS, NZS |
| 9 | D-TIMES_3 | Japan | BAU, NZS |
| 10 | DNE21+ V.16_JMIP | Japan | BAU, NZS |
| 11 | ELENA v1 | Ecuador | BAU, CPS, NZS |
| 12 | GCAM KAIST 2.0 | South Korea | CPS, NZS |
| 13 | GCAM-China-v6 | China | BAU, CPS, NZS |
| 14 | GCAM-KSA V1.0 | Saudi Arabia | BAU, CPS, NZS |
| 15 | GCAM-USA-CGS | United States | BAU, CPS, NZS |
| 16 | GTEM-C v1 | Australia | CPS, NZS |
| 17 | IEEJ-NE_Japan v2023 | Japan | BAU, NZS |
| 18 | IMED_China V1.0 | China | BAU, CPS, NZS |
| 19 | India Energy Policy Simulator 3.1.3 | India | CPS, NZS |
| 20 | KLEM-DZA 2 | Algeria | BAU, CPS, NZS |
| 21 | KLEM/ENERGYPATHWAYS/RIO-MX 1 | Mexico | CPS, NZS |
| 22 | KLEM/LEAP-ARG 1 | Argentina | BAU, CPS, NZS |
| 23 | MESSAGEix-Canada 1 | Canada | BAU, CPS, NZS |
| 24 | MESSAGEix-Turkey 5 | Turkey | BAU, CPS, NZS |
| 25 | PECE-LIU 2024_V1.0 | China | BAU, CPS, NZS |
| 26 | PROMETHEUS V2 China | China | CPS, NZS |
| 27 | PROMETHEUS V2 India | India | CPS, NZS |
| 28 | Swiss TIMES Energy System Model (STEM) 2 | Switzerland | BAU, CPS, NZS |
| 29 | TIMES-Japan 3.3 | Japan | BAU, NZS |
| 30 | TIMES-Japan 3.4 | Japan | BAU, NZS |
| 31 | TIMES-Portugal 9.3 | Portugal | BAU, CPS, NZS |
| 32 | UNICON-K-Power 2 | South Korea | BAU, NZS |
